# Supplementary material for: Xenoestrogenic activity in blood of European and Inuit populations
Source: PubMed Central journal article supplement (PMC1481538; doi:10.1186/1476-069x-5-12), 2006-05-05
Supplement: 1476-069X-5-12-S1.pdf [file 1476-069X-5-12-S1.pdf]

**Additional file 1: Spearman's correlation analyses between xenoestrogenic serum activities and the level of CB153 and *p,p'*-DDE.**

|                        | Greenland |                      |                 | Warsaw   |                      |                | Sweden   |                      |                 | Kharkiv  |                      |                 |
|------------------------|-----------|----------------------|-----------------|----------|----------------------|----------------|----------|----------------------|-----------------|----------|----------------------|-----------------|
|                        | <i>n</i>  | <i>r<sub>s</sub></i> | <i>p</i>        | <i>n</i> | <i>r<sub>s</sub></i> | <i>p</i>       | <i>n</i> | <i>r<sub>s</sub></i> | <i>p</i>        | <i>n</i> | <i>r<sub>s</sub></i> | <i>p</i>        |
| <b>CB153</b>           |           |                      |                 |          |                      |                |          |                      |                 |          |                      |                 |
| XER                    | 70        | -.22                 | .07             | 98       | .02                  | .89            | 98       | .007                 | .95             | 82       | .13                  | .26             |
| XER-EEQ*               | -         | -                    | -               | 21       | <b>-.45</b>          | <b>.04</b>     | 10       | .07                  | .86             | 11       | -.15                 | .67             |
| XERcomp                | 68        | .15                  | .21             | 94       | .07                  | .50            | 92       | -.13                 | .21             | 82       | .03                  | .81             |
| <b><i>p,p'</i>-DDE</b> |           |                      |                 |          |                      |                |          |                      |                 |          |                      |                 |
| XER                    | 70        | <b>-.29</b>          | <b>.02</b>      | 98       | <b>.21</b>           | <b>.04</b>     | 98       | -.04                 | .72             | 82       | -.09                 | .42             |
| XER-EEQ*               | -         | -                    | -               | 21       | -.13                 | .57            | 10       | .12                  | .75             | 11       | -.09                 | .79             |
| XERcomp                | 68        | .11                  | .37             | 94       | .13                  | .21            | 92       | -.18                 | .08             | 82       | .02                  | .85             |
| CB153/DDE <sup>1</sup> | 70        | <b>.94</b>           | <b>&lt;.001</b> | 98       | <b>.28</b>           | <b>&lt;.01</b> | 98       | <b>.75</b>           | <b>&lt;.001</b> | 82       | <b>.45</b>           | <b>&lt;.001</b> |

ln-transformed and POP lipid adjusted data was used. For definition of XER, XERcomp and XER-EEQ see legend to Table 2. Statistical significant data is given in bold. <sup>1</sup>: Spearman's inter-correlation between CB-153 and *p,p'*-DDE, respectively
